# Supplementary material for: QM/MM studies of structural and energetic properties of the far-red fluorescent protein HcRed
Source: Royal Society of Chemistry journal article supplement (doi:10.1039/b918523b), 2010-01-01
Supplement: b918523b.pdf [file b918523b.pdf]

## Supporting information

### QM/MM Studies of the Far-red Fluorescent Protein HcRed

*Qiao Sun, Markus Doerr, Zhen Li, Sean C. Smith, Walter Thiel*

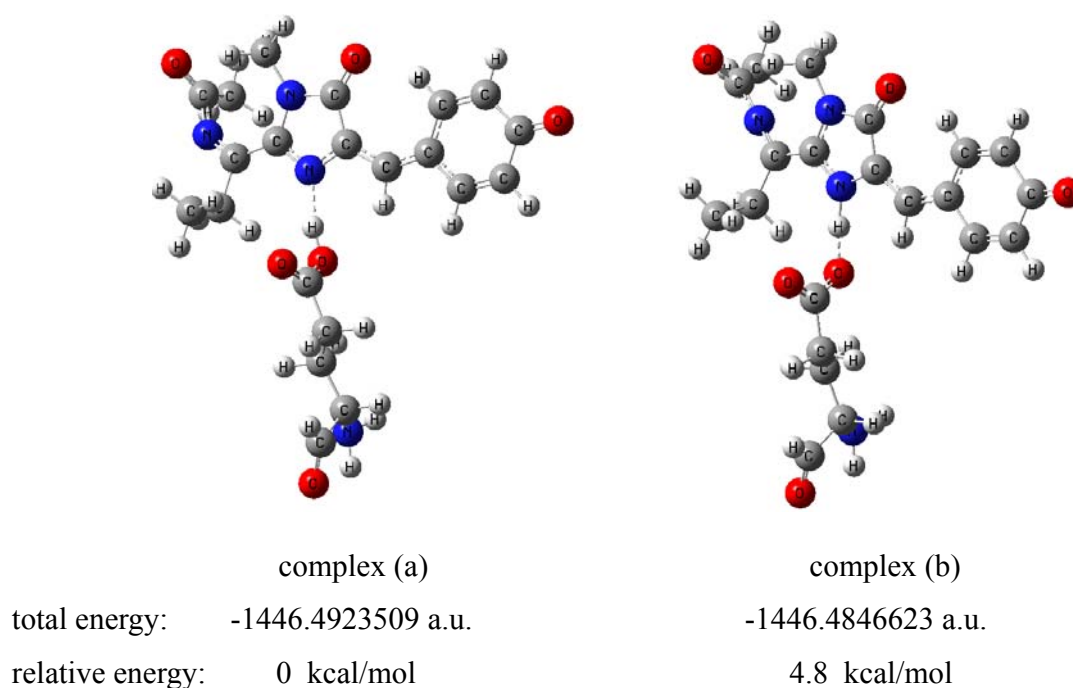

Figure S1. Gas-phase B3LYP/6-31+G\* energies of hydrogen bonded complexes between (a) anionic chromophore and protonated Glu214, and (b) zwitterionic chromophore and deprotonated Glu214.

Table S1. Geometry of the QM region for model A of HcRed (*cis*-chromophore): Average values from SCC-DFTB/MM MD simulation and experimental data (see Tables 2 and 3 for notation).  $\Delta m$  is the rms deviation between the average MD values and the X-ray data.

| Bond lengths (Å)   | MD    | $\Delta m$ | Exp <sup>15</sup> |
|--------------------|-------|------------|-------------------|
| OH_CZ              | 1.263 | -0.104     | 1.367             |
| CZ_CE1             | 1.459 | 0.030      | 1.429             |
| CE1_CD1            | 1.367 | -0.075     | 1.442             |
| CD1_CG2            | 1.439 | 0.004      | 1.435             |
| CG2_CD2            | 1.441 | -0.001     | 1.442             |
| CD2_CE2            | 1.365 | -0.060     | 1.425             |
| CE2_CZ             | 1.459 | 0.025      | 1.434             |
| CG2-CB2            | 1.400 | -0.095     | 1.495             |
| CB2-CA2            | 1.413 | 0.024      | 1.389             |
| CA2-N2             | 1.387 | 0.015      | 1.372             |
| N2-C1              | 1.341 | -0.009     | 1.350             |
| C1-N3              | 1.413 | -0.024     | 1.437             |
| N3-C2              | 1.383 | -0.031     | 1.414             |
| C2-CA2             | 1.447 | -0.019     | 1.466             |
| O2-C2              | 1.287 | 0.050      | 1.237             |
| C1-CA1             | 1.463 | 0.006      | 1.457             |
| CA1-CB1            | 1.514 | -0.030     | 1.544             |
| CB1-CG1            | 1.533 | -0.008     | 1.541             |
| CG1-CD3            | 1.588 | 0.089      | 1.499             |
| CD3-OE2            | 1.285 | -0.087     | 1.372             |
| CD3-OE1            | 1.266 | 0.029      | 1.237             |
| CA1-N              | 1.299 | 0.029      | 1.270             |
| N3-CA3             | 1.443 | -0.126     | 1.569             |
| CA3-C              | 1.522 | 0.334      | 1.188             |
| C-O                | 1.260 | -0.112     | 1.372             |
| N64-63C            | 1.371 | 0.100      | 1.271             |
| 63C-63O            | 1.234 | -0.002     | 1.236             |
| 63C-63CA           | 1.534 | 0.009      | 1.525             |
| 64C-65N            | 1.352 | 0.007      | 1.345             |
| 65N-65CA           | 1.459 | -0.012     | 1.471             |
| 65CA-65CB          | 1.524 | -0.001     | 1.525             |
| 65CB-65OG          | 1.426 | 0.015      | 1.411             |
| 65CA-65C           | 1.483 | -0.047     | 1.530             |
| Dihedral angle (°) |       |            |                   |
| N2_CA2_CB2_CG2     | 7.8   | 7.8        | 0.0               |
| CA2_CB2_CG2_CD1    | 8.6   | 0.2        | 8.4               |
| Distance (Å)       |       |            |                   |
| O_NE2(Gln107)      | 3.140 | 0.121      | 3.019             |
| O2_NH2(Arg93)      | 2.689 | -0.501     | 3.190             |
| OH_OG(Ser144)      | 2.888 | 0.287      | 2.601             |
| N2_OE2(Glu214)     | 3.626 | 0.660      | 2.966             |
| N2_NE2(Gln40)      | 2.993 | -0.190     | 3.183             |

Table S2. Relevant dihedral angles (°) and hydrogen bond distances (Å) for the *cis*- and *trans*-chromophore in model A of HcRed: DFT/MM optimized values for snapshots 1-4 and experimental data (see Figure 1a for atom labels).

| Snapshots                                | 1      | 2      | 3      | 4      | Exp <sup>15</sup> |
|------------------------------------------|--------|--------|--------|--------|-------------------|
| <i>cis</i> -conformer / dihedral angle   |        |        |        |        |                   |
| N2_CA2_CB2_CG2                           | 7.3    | 7.0    | 7.0    | 6.2    | 0.0               |
| CA2_CB2_CG2_CD1                          | 8.8    | 8.3    | 9.0    | 8.3    | 8.4               |
| <i>cis</i> -conformer / distance         |        |        |        |        |                   |
| O_NE2(Gln107)                            | 3.355  | 3.356  | 3.407  | 3.415  | 3.091             |
| O2_NH2(Arg93)                            | 2.646  | 2.647  | 2.646  | 2.645  | 3.190             |
| OH_OG(Ser144)                            | 2.658  | 2.687  | 2.684  | 2.699  | 2.601             |
| OH_OH(TIP3189)                           | 2.728  | 2.721  | 2.747  | 2.719  |                   |
| N2_OE2(Glu214)                           | 3.041  | 2.961  | 2.980  | 3.001  | 2.966             |
| OE1_NE2(Gln40)                           | 2.788  | 2.791  | 2.802  | 2.802  | 3.183             |
| <i>trans</i> -conformer / dihedral angle |        |        |        |        |                   |
| N2_CA2_CB2_CG2                           | -174.8 | -174.3 | -174.4 | -173.5 | 175.7             |
| CA2_CB2_CG2_CD1                          | 26.3   | 26.5   | 27.2   | 24.9   | 48.2              |
| <i>trans</i> -conformer / distance       |        |        |        |        |                   |
| O_NE2(Gln107)                            | 3.569  | 3.522  | 3.575  | 3.559  | 3.091             |
| O2_NH2(Arg93)                            | 2.695  | 2.688  | 2.692  | 2.690  | 3.190             |
| N2_OE2(Glu214)                           | 2.903  | 2.878  | 2.899  | 2.908  | 2.996             |
| OE1_NE2(Gln40)                           | 2.801  | 2.802  | 2.807  | 2.813  | 3.183             |
| OH_OE2((Glu146)                          | 2.568  | 2.571  | 2.566  | 2.574  | 3.062             |
| OH_ND2(Asn159)                           | 3.761  | 3.582  | 3.771  | 3.757  | 3.069             |

Table S3. QM energies (a.u.), MM energies (a.u.), total QM/MM energies (a.u.), and relative energies (kcal/mol) for *cis*- and *trans*-conformers in model A of HcRed: DFT(B3LYP/SV(P))/MM results for snapshots 1-4.

| snapshot       | $E_{(QM,MM)}$<br>(a.u.) | $\Delta E_Q$<br>(kcal/mol) | $E_{(MM,QM)}$<br>(a.u.) | $\Delta E_M$<br>(kcal/mol) | $E_{total}$<br>(a.u.) | $\Delta E_t$<br>(kcal/mol) |
|----------------|-------------------------|----------------------------|-------------------------|----------------------------|-----------------------|----------------------------|
| 1 <i>cis</i>   | -1479.051467            | 0                          | -54.526707              | 0                          | -1533.571910          | 0                          |
| 1 <i>trans</i> | -1479.045203            | -3.9                       | -54.522132              | 2.9                        | -1533.573600          | -1.1                       |
| 2 <i>cis</i>   | -1479.061768            | 0                          | -53.910447              | 0                          | -1532.972215          | 0                          |
| 2 <i>trans</i> | -1479.064876            | -2.0                       | -53.910819              | -0.2                       | -1532.975695          | -2.2                       |
| 3 <i>cis</i>   | -1479.066244            | 0                          | -52.530826              | 0                          | -1531.597069          | 0                          |
| 3 <i>trans</i> | -1479.072476            | -3.9                       | -52.531640              | -0.5                       | -1531.604116          | -4.4                       |
| 4 <i>cis</i>   | -1479.036883            | 0                          | -54.809072              | 0                          | -1533.845955          | 0                          |
| 4 <i>trans</i> | -1479.046814            | -6.2                       | -54.803605              | 3.4                        | -1533.850419          | -2.8                       |

Table S4. Geometry of the QM region for model C of HcRed (*cis*-chromophore): Average values from SCC-DFTB/MM MD simulation and experimental data (see Tables 2 and 3 for notation).  $\Delta m$  is the rms deviation between the average MD values and the X-ray data.

| Bond length (Å)    | MD    | $\Delta m$ | Exp <sup>15</sup> |
|--------------------|-------|------------|-------------------|
| OH_CZ              | 1.268 | -0.099     | 1.367             |
| CZ_CE1             | 1.455 | 0.026      | 1.429             |
| CE1_CD1            | 1.369 | -0.073     | 1.442             |
| CD1_CG2            | 1.439 | 0.004      | 1.435             |
| CG2_CD2            | 1.440 | -0.002     | 1.442             |
| CD2_CE2            | 1.366 | -0.059     | 1.425             |
| CE2_CZ             | 1.456 | 0.022      | 1.434             |
| CG2-CB2            | 1.400 | -0.095     | 1.495             |
| CB2-CA2            | 1.411 | 0.022      | 1.389             |
| CA2-N2             | 1.381 | 0.009      | 1.372             |
| N2-C1              | 1.342 | -0.008     | 1.350             |
| C1-N3              | 1.421 | -0.016     | 1.437             |
| N3-C2              | 1.380 | -0.034     | 1.414             |
| C2-CA2             | 1.450 | -0.016     | 1.466             |
| O2-C2              | 1.289 | 0.052      | 1.237             |
| C1-CA1             | 1.453 | -0.004     | 1.457             |
| CA1-CB1            | 1.503 | -0.041     | 1.544             |
| CB1-CG1            | 1.537 | -0.004     | 1.541             |
| CG1-CD3            | 1.587 | 0.088      | 1.499             |
| CD3-OE2            | 1.284 | -0.088     | 1.372             |
| CD3-OE1            | 1.267 | 0.030      | 1.237             |
| CA1-N              | 1.318 | 0.048      | 1.270             |
| N3-CA3             | 1.441 | -0.128     | 1.569             |
| CA3-C              | 1.520 | 0.332      | 1.188             |
| C-O                | 1.262 | -0.110     | 1.372             |
| N64-63C            | 1.340 | 0.069      | 1.271             |
| 63C-63O            | 1.263 | 0.027      | 1.236             |
| 63C-63CA           | 1.536 | 0.011      | 1.525             |
| 64C-65N            | 1.355 | 0.010      | 1.345             |
| 65N-65CA           | 1.463 | -0.008     | 1.471             |
| 65CA-65CB          | 1.522 | -0.003     | 1.525             |
| 65CB-65OG          | 1.439 | 0.028      | 1.411             |
| 65CA-65C           | 1.481 | -0.049     | 1.530             |
| Dihedral angle (°) |       |            |                   |
| N2_CA2_CB2_CG2     | 3.7   | 3.7        | 0.0               |
| CA2_CB2_CG2_CD1    | 5.4   | 5.4        | 8.4               |
| Distance (Å)       |       |            |                   |
| O_NE2(Gln107)      | 3.148 | 0.129      | 3.019             |
| O2_NH2(Arg93)      | 2.670 | -0.520     | 3.190             |
| OH_OG(Ser144)      | 2.794 | 0.193      | 2.601             |
| N2_OE2(Glu214)     | 3.087 | 0.121      | 2.966             |
| N2_NE2(Gln40)      | 2.765 | -0.418     | 3.183             |

Table S5. Relevant dihedral angles ( $^{\circ}$ ) and hydrogen bond distances ( $\text{\AA}$ ) for the *cis*- and *trans*-chromophore in model C of HcRed: DFT/MM optimized values for snapshots 1-4 and experimental data (see Figure 1a for atom labels).

| Snapshots                                         | 1      | 2      | 3      | 4      | Exp <sup>15</sup> |
|---------------------------------------------------|--------|--------|--------|--------|-------------------|
| <i>cis</i> -conformer / dihedral angle            |        |        |        |        |                   |
| N2_CA2_CB2_CG2                                    | 1.7    | -2.4   | -4.3   | -0.5   | 0.0               |
| CA2_CB2_CG2_CD1                                   | 5.0    | -1.7   | -4.8   | 0.5    | 8.4               |
| <i>cis</i> -conformer / distance ( $\text{\AA}$ ) |        |        |        |        |                   |
| O_NE2(Gln107)                                     | 3.234  | 3.192  | 3.070  | 3.123  | 3.091             |
| O2_NH2(Arg93)                                     | 2.657  | 2.652  | 2.621  | 2.663  | 3.190             |
| OH_OG(Ser144)                                     | 2.690  | 2.636  | 2.628  | 2.680  | 2.601             |
| OH_OH(TIP3)                                       | 2.659  | 2.672  | 2.667  | 2.675  |                   |
| N2_OE2(Glu214)                                    | 3.192  | 3.281  | 3.252  | 3.181  | 2.966             |
| OE1_NE2(Gln40)                                    | 2.750  | 2.740  | 2.749  | 2.757  | 3.183             |
| <i>trans</i> -conformer / dihedral angle          |        |        |        |        |                   |
| N2_CA2_CB2_CG2                                    | -179.3 | -175.0 | -179.0 | -179.8 | 175.7             |
| CA2_CB2_CG2_CD1                                   | 11.3   | 14.3   | 11.9   | 11.7   | 48.2              |
| <i>trans</i> -conformer / distance                |        |        |        |        |                   |
| O_NE2(Gln107)                                     | 3.200  | 3.259  | 3.197  | 3.302  | 3.091             |
| O2_NH2(Arg93)                                     | 2.709  | 2.732  | 2.712  | 2.768  | 3.190             |
| N2_OE2(Glu214)                                    | 3.237  | 3.166  | 3.223  | 3.225  | 2.996             |
| OE1_NE2(Gln40)                                    | 2.939  | 2.764  | 2.929  | 2.991  | 3.183             |
| OH_OE2((Glu146)                                   | 3.872  | 3.897  | 3.863  | 3.941  | 3.062             |
| OH_ND2(Asn159)                                    | 2.731  | 2.781  | 2.716  | 2.756  | 3.069             |

Table S6. QM energies (a.u.), MM energies (a.u.), total QM/MM energies (a.u.), and relative energies (kcal/mol) for *cis*- and *trans*-conformers in model C of HcRed: DFT(B3LYP/SV(P))/MM results for snapshots 1-4.

| snapshot       | $E_{(QM,MM)}$<br>(a.u.) | $\Delta E_Q$<br>(kcal/mol) | $E_{(MM,QM)}$<br>(a.u.) | $\Delta E_M$<br>(kcal/mol) | $E_{total}$<br>(a.u.) | $\Delta E_t$<br>(kcal/mol) |
|----------------|-------------------------|----------------------------|-------------------------|----------------------------|-----------------------|----------------------------|
| 1 <i>cis</i>   | -1478.951590            | 0                          | -54.391207              | 0                          | -1533.342798          | 0                          |
| 1 <i>trans</i> | -1478.920977            | 19.2                       | -54.402107              | -6.8                       | -1533.323084          | 12.4                       |
| 2 <i>cis</i>   | -1478.960166            | 0                          | -54.490546              | 0                          | -1533.450711          | 0                          |
| 2 <i>trans</i> | -1478.911922            | 30.1                       | -54.507035              | -10.3                      | -1533.418958          | 19.9                       |
| 3 <i>cis</i>   | -1478.911795            | 0                          | -54.401293              | 0                          | -1533.313087          | 0                          |
| 3 <i>trans</i> | -1478.889611            | 13.9                       | -54.399474              | 1.1                        | -1533.289084          | 15.1                       |
| 4 <i>cis</i>   | -1478.940143            | 0                          | -54.019252              | 0                          | -1532.959394          | 0                          |
| 4 <i>trans</i> | -1478.910184            | 18.8                       | -54.020366              | -0.7                       | -1532.930550          | 18.1                       |
